# Supplementary material for: Metabolic divergence between island populations of the Canarian plant Bethencourtia palmensis and their endophytic fungi: a potential new source of biopesticides
Source: Research Square preprint supplement (doi:10.21203/rs.3.rs-7252507/v1), 2025-08-25
Supplement: Supplementary file 1 [file 1a8d15003526f28b646a0dc9.xlsx]

## Sheet: Hoja1
	Compound (% peak area)	Pe. SPH17	Cl. BPM13	As. SPH2	Au. BPT1	Au. BPH3	Au. BPH5	Alt. BPF6	Alt. BPH1	Alt. BPT4	Alt. BPF4.1	Alt. BPF7	Pe. BPH4	As. BPG5	Alt. BPF5	St. BPF9	Alt. BPT2	Pe. BPG2	Mu.BPG3	St. BPF8	As. BPM7.2	As. BPM2	As. BPM5	As. BPM1	As. BPM9.2	As. BPG6.2	As. BPM3	As. BPM7.1	As. BPH6	St. BPT9	As. SPH9	As. BPT13	Ph. BPT11	Alt. BPT3	Au. BPT15	Ep. BPF3	Pe. BPM4	Database ID	% Similarity	Ret. Time	MS spectrum
	Comp. 1		1.03			2.03								0.3								0.7	4.43	2.98	0.84	1.9	4.75	5.11										Phenethyl alcohol	98	3.406	91/92/122/65/43/39/51/77/93/63
	Comp. 2																								0.48	3.2			2.96			1.48						Ethyl hydrogen succinate	96	3.813	101/129/128/73/102/55/74/56/45/100
	Comp. 3																									4.81												Butanedioic acid, diethyl ester	96	3.816	101/129/73/128/55/102/74/56/45/100
	Comp. 4																						1.45			0.49												2-Phenylethyl formate	95	4.048	104/91/127/99/65/105/78/103/77/82
	Comp. 5																		1.37					0.4		0.48												4-(1-hydroxy-ethyl)-g-butanolactone	91	4.162	86/85/45/57/58/43/44/42/55/87
	Comp. 6																				1.77	0.48	0.91	1.91	1.91	0.68											0.78	2,4-Dimethylbenzaldehyde	97	4.415	133/134/105/77/79/91/103/51/38/135
	Comp. 7																	2.57	1.6					0.32	0.49			1.62									1.89	2-Coumaranone	95	4.6	78/134/106/91/51/77/52/38/50/105
	Comp. 8																									2.1			3.98									Diethyl 2-hydroxysuccinate	88	4.817	71/43/117/89/58/75/42/53/72/118
	Comp. 9									1.25	3.86			1.07	0.66			2.19			3.63	5.21	4.86	3.49	2.79		6.9	15.52						1.53			1.07	DL-Mevalonic acid lactone	96	4.963	43/71/58/42/53/41/85/103/39/61
	Comp. 10																								2.1	0.9			5.32			20.1						Succinic acid, butyl ethyl ester	92	6.167	101/129/73/55/102/45/56/130/157/74
	Comp. 11																								1	0.57												Ethyl 4-hydroxyphenylacetate	89	7.038	134/106/107/78/77/180/101/129/79/71
	Comp. 12																	4.48						2.01													2.92	Tyrosol	95	7.117	107/138/77/108/79/78/51/53/39/91
	Comp. 13																												1.17			1.69						Unidentified	78	7.474	69/87/73/59/43/41/115/45/42/88
	Comp. 14	95.01	2.01										2.01																									Penicillic acid	88	7.6759	69/41/129/39/127/101/84/59/42/125
	Comp. 15				19.69	35.22	27.6																												7.43			Massoia Lactone	95	7.94	97/68/69/41/39/39/108/40/98/96/55
	Comp. 16																							0.85				1.68										Unidentified	70	7.957	87/59/56/142/69/41/114/74/45/58
	Comp. 17																					1.26	6.8	1.26	1.28	24.68	15.99	12.02	2.77									2-(4-hexyl-2,5-Dioxofuran-3-yl)acetic acid	86	8.026	126/98/43/41/95/70/67/140/139/81
	Comp. 18		0.6							0.37						0.25	0.61				1.61			0.8	1												0.34	C20 alkane	89	8.123	57/71/85//281/73/43/99/147/327/415
	Comp. 19								0.81								1.74																					N,N-Dimethyldodecylamine	98	8.237	58/59/213/41/42/44/55/84/57
	Comp. 20																						1.51															Unidentified	64	8.267	57/85/71/56/73/281/84/69/83/107
	Comp. 21		0.63							0.47	0.57	0.53		0.31	0.98	0.47	1.02	0.6			3.21		0.68	1.03	1.97	0.69	3		0.7							0.94	0.29	2,4-Di-tert-butylphenol	94	8.558	57/55/43/69/70/83/71/56/41/85
	Comp. 22			1.50																																		3-Cyano-3-methyl-4-oxopentanamide	80	8.78816	112/67/45/43/111/94/66/39/41/97
	Comp. 23																	6.44				1.1			1.59	0.75											8.19	4-Hydroxyphenylacetic acid	97	9.009	107/152/77/108/79/78/51/53/39/153
	Comp. 24																		1.17																			4-Methyl-3,6-diisopropyl-2,5-diketomorpholine	91	9.024	83/42/171/69/84/142/71/86/88/41
	Comp. 25		66.66	32.05																																		Mellein	97	9.093	134/178/160/106/78/104/77/132/135/149
	Comp. 26																	1.99																				Unidentified	59	9.127	57/71/223/43/39/85/99/83/134/224
	Comp. 27																															1.92						Ethyl 2-(4-hydroxyphenyl)acetate	87	9.157	107/180/77/84/108/78/181/79/44/53
	Comp. 28			1.12																																		Ethanone, 1-(3,4-dihydro-6-methyl-2H-pyran-2-yl)-	83	9.23481	97/43/140/45/69/124/39/96/81/41
	Comp. 29			1.13																																		Unidentified	74	9.60331	124/95/67/45/43/140/113/112/94/141
	Comp. 30					2.38	1.62																															4-Hydroxyl-L-proline, methyl ester	84	9.683	86/68/55/83/41/43/97/39/69/57
	Comp. 31			1.02																																		Unidentified	70	9.74898	180/151/179/43/41/81/123/152/137/109
	Comp. 32								0.49						20.31		3.04																					2-Fluorobenzoic acid. heptadecyl ester	86	10.031	141/123/43/69/84/57/98/86/41/85
	Comp. 33																																1.72					α-Cedrol	96	10.071	95/150/151/81/119/93/135/107/43/109
	Comp. 34																									1.18			0.8									Succinic acid, ethyl 2-heptyl ester	85	10.713	129/101/115/69/87//73/55/14
	Comp. 35			30.30																																		Unidentified	73	10.8014	182/207/123/153/41/139/137/43/165/94
	Comp. 36			2.58																																		Unidentified	73	10.9047	123/166/165/193/41/167/95/97/182
	Comp. 37																														2.69							Unidentified	74	11.0648	43/58/140/95/67/41/69/152/79/111
	Comp. 38																									3.11					14.92	8.07		2.19				9- Hidroxy-hexyl-itaconic acid-1-methyl ester	89	11.3407	140/45/95/67/151/111/41/43/122/123
	Comp. 39		4.92		3.64	0.26	0.41	6.46	2.11	5.59	1.98	5.76	7.21	13.74	4.79	17.77	10.57	12.64	3.22	2.5	4.3	0.98	8.13	1.04	4.07	1.07	2.04	2.12	0.63				1.76	4.24	1.5	9.45	0.49	Acrylic acid tetradecanyl ester	90	11.434	55/69/83/73/70/56/57/43/97/41
	Comp. 40																									7.6												Unidentified	73	11.448	112/197/81/123/67/43/55/41/140/129
	Comp. 41																					3.11					8.07		2.19									Unidentified	73	11.583	140/95/45/67/151/111/122/123/94/79
	Comp. 42				16.23	45.01	33.38																												5.4			3,5-Dihydroxydecanoic acid d-lactone	95	11.622	97/115/73/43/89/55/71/83/41/45
	Comp. 43		1.5																																			Unidentified	71	11.764	125/97/113/140/43/45/111/141/124/168
	Comp. 44																					2.32			1.21	1.07			2.53									Unidentified	79	11.916	122/150/123/94/196/65/67/151/66/149
	Comp. 45																									6.98												Unidentified	73	12.138	112/129/43/41/169/84/55/81/67/113
	Comp. 46																														1.40							Unidentified	73	12.3845	126/69/45/140/41/67/95/43/151/166
	Comp. 47		1.37																																			Unidentified	71	12.462	180/137/207/222/43/41/109/151/81/181
	Comp. 48							3.63	2.71			1.7			2.48		7.32																					2-Acetamidophenol	82	12.56	43/166/123/124/67/69/55/77/51/65
	Comp. 49							1.23																														Unidentified	57	12.573	162/149/121/134/222/69/65/43/93/57
	Comp. 50							1.39																														Unidentified	67	12.701	81/56/99/69/41/55/107/96/39/149
	Comp. 51					0.26														1.15																		C19 alkane	95	12.794	97/83/69/57/55/43/111/70/41/71
	Comp. 52																					1.6				1.74												Unidentified	78	12.807	126/41//98/154/69/67/70/55/88/43
	Comp. 53			1.00																																		Unidentified	75	12.8523	57/41/169/85/127/83/43/69/59/110
	Comp. 54									4.9																												2-Acetamidophenol isomer	81	12.864	43/166/123/124/67/114/77/65/162/39
	Comp. 55																														3.76							Unidentified	70	12.9903	43/140/168/126/69/41/87/151/166/67
	Comp. 56				0.33	0.2	0.2	0.56	0.99	0.82	0.93	0.4			0.66	1.4	1.21	0.4	0.37	1.06													0.23	0.74			0.42	Cyclo(L-prolyl-L-valine)	95	13.201	154/70/72/125/41/69/68/55/155/153
	Comp. 57			10.58																																		Unidentified	74	13.3906	197/198/223/43/41/169/139/180/205/137
	Comp. 58																									1.1												Succinic acid, 2-phenylethyl propyl ester	94	13.433	101/129/104/105/115/55/73/69/87/130
	Comp. 59																									1.49												Unidentified	66	13.497	152/166/125/180/223/41/222/194/43/138
	Comp. 60																														1.67							Unidentified	63	14.0331	88/209/101/55/165/129/41/83/163/70
	Comp. 61		1.03																																			Unidentified	71	14.044	139/181/182/191/111/83/43/224/41/42
	Comp. 62													5.6																								Unidentified	77	14.1	119/105/91/79/145/93/158/117/131/159
	Comp. 63																																			1.92		Unidentified	60	14.12	292/207/235/293/261/249/246/194/277/247
	Comp. 64																		5.45																		2.55	n-Heptadecanol-1	97	14.149	83/55/97/69/57/43/41/70/82/56
	Comp. 65																																0.5			1.49		Bisab 2,16	85	14.18	149/57/150/44/41/40/223/75/167/93
	Comp. 66																																				1.52	Unidentified	63	14.366	149/193/68/104/152/76/132/148/41/194
	Comp. 67		0.59			0.55	2.29			10	3.95		4.8	3.9	4.21	1.75	2.49						1.43	1.92						15.28				6.18	3.57			C15-C19 alkane	96	14.401	83/55/57/69/97/70/56/41/82/43
	Comp. 68																														4.24							Unidentified	68	14.472	43/126/69/41/121/166/98/93/67/79
	Comp. 69		0.57		3.6	1.38	1.64		3.09	4.44	1.91	0.4		0.83	5.46	10.35	3.04	2.32	4.27	10.9	1.4	2.52	1.62	2.69	1.81	0.92	5.97	5.88	1.69	10.98		1.07	1.18	4.61	2.85	3.56	2.4	Cyclo(Pro-Val)	89	14.671	154/70/43/69/126/41/86/125/121/98
	Comp. 70													1.45																								Unidentified	68	14.766	91/131/105/158/101/186/95/119/79/118
	Comp. 71				1.34							0.64																									0.88	7,9-Di-tert-butyl-1-oxaspiro(4,5)deca-6,9-diene-2,8-dione	83	14.779	205/57/175/217/189/177/55/220/41/232
	Comp. 72																	0.72				1.16			1.01	0.5	1.37											5 Butyl-5-ethylpentadecane	80	14.815	57/71/85/43/99/69/113/41/127/55
	Comp. 73										2.66				1.27		1.77				2.03																	Methyl palmitate	95	14.825	74/87/57/43/71/55/85/143/41/75
	Comp. 74																					2.46							1.46									Unidentified	72	14.932	97/130/154/70/55/143/69/43/83/98
	Comp. 75															0.62		0.72			1	1.08			1.58	0.55	1.4											C20 alkane	83	15.423	57/71/85/43/99/113/69/55/127/83
	Comp. 76								3.34																													Unidentified	73	15.482	179/69/152/41/68/86/59/57/180/137
	Comp. 77		1.32		2.1	0.75	2.59	1.89	0.73	2.23	2.2	2.03	2.7	1.73	2.46	4.38	2.59	2.61	2.27	0.67	6.54		4.69	8.99	6.82	2.04	6.12	6.2	1.6	4.9			5.65	1.66	2.35	4.61	4.79	Palmitic acid	90	15.497	73/60/57/55/43/41/71/129/85/256
	Comp. 78																					1.12																Unidentified	68	15.5	59/95/72/169/109/97/43/93/151/69
	Comp. 79																				3.29			1.21	2		2.19											Unidentified	62	15.531	305/361/249/306/362/193/151/307/417/363
	Comp. 80														1.56																							Unidentified	67	15.555	152/86/68/59/69/44/55/43/41/84
	Comp. 81				0.68			0.47									4.07		0.57		0.87													0.91	1.77			Bisab 2,16	97	15.577	149/150/41/57/205/223/56/104/73/93
	Comp. 82																					1.01			1.28													Unidentified	66	15.625	43/107/69/109/135/169/111/123/97/85
	Comp. 83																						1.34															Unidentified	64	15.75	43/59/109/107/221/69/169/135/113/55
	Comp. 84																				0.74	1.92			2.12	2.16			3.81			4.36						Ethyl palmitate	97	15.774	88/101/43/70/55/157/73/57/89/41
	Comp. 85											3.47																										Unidentified	73	15.946	106/105/162/91/80/161/79/147/107/77
	Comp. 86												0.62								1.51		0.56	0.48	0.42							1.38						Octacosyl acetate-isomer	93	15.99	97/43/69/83/55/57/61/70/82/44
	Comp. 87				0.27			0.44		0.67			0.51	1.89		2.15	0.86	0.55					0.8											0.43				Dodecyl 3-sulfanylpropanoate	85	16.273	57/106/43/71/55/69/83/88/85/107
	Comp. 88							12.85	21.79																													Unidentified	71	16.328	181/69/111/41/189/58/189/58/182/139/57/39
	Comp. 89																																	1.4	2.12			2-tert-Butyl-4-(2-phenylpropan-2-yl)phenol	91	16.371	253/268/254/57/119/91/105/103/41/269
	Comp. 90												1.91																									Unidentified	78	16.383	178/91/163/119/165/147/133/179/77/248
	Comp. 91									0.93		9.68					0.43																					Unidentified	71	16.531	106/105/162/91/80/161/79/147/107/77
	Comp. 92		0.85				2.99			4.17	7.37		1.38	2.23	4.69	3.75			11.13	2.05		1.09								21.33				13.54	3.32		2.7	Oleyl Alcohol	96	16.989	82/55/81/96/67/69/95/83/68/41
	Comp. 93																2.9																	8.06	3.32			2,4-ditert-Butyl-6-(1-phenylethyl)phenol	84	17.073	309/310/324/119/57/91/133/325/293/41
	Comp. 94				0.44	0.2	1.93								2.82				3.7					1.07													1.87	C19-C27 alkane	95	17.14	83/97/57/69/55/111/43/82/70/56
	Comp. 95								1.02																													Unidentified	62	17.179	72/69/197/73/181/153/44/111/58/55
	Comp. 96																																	1.72	1.57			Unidentified	77	17.232	57/71/85/43/99/252/184/113/41/185
	Comp. 97									5.47	4.96		4.21	2.46	1.06	2.23	0.55													9.68								C19-C24 alkane	96	17.318	83/69/97/57/55/43/111/70/71/82
	Comp. 98	1.18																																				Unidentified	74	17.4557	191/264/176/192/147/177/265/69/77/91
	Comp. 99			1.15																																		Unidentified	76	17.4799	98/85/96/41/43/69/99/83/97/55
	Comp. 100								2.25																													Unidentified	68	17.509	181/69/111/189/41/139/58/182/220/238
	Comp. 101																																	0.88	1.43			trans-1,1'-Bibenzoindanylidene	81	17.619	117/232/115/215/217/202/233/118/116/216
	Comp. 102								1.46										2.07																			Unidentified	73	17.787	355/73/55/69/83/281/221/97/147/43
	Comp. 103										4.86																											Unidentified	48	17.788	228/210/184/74/87/230/147/43/57/186
	Comp. 104				2.84	0.22	2.3	0.85									1.6																7.77		2.7			9-Octadecenoic acid	92	17.797	55/69/83/97/41/84/43/57/98/96
	Comp. 105																				1.78																	Unidentified	63	17.797	355/73/57/281/85/71/221/147/356/43
	Comp. 106																0.68	0.39																				Methyl stearate	94	17.81	74/87/143/43/75/55/255/57/41/199/
	Comp. 107																												2.24			1.5						Unidentified	70	17.979	177/69/105/195/149/121/41/93/126/159
	Comp. 108												0.79			1.5																						Unidentified	55	17.985	174/355/73/55/221/69/83/147/281/97
	Comp. 109					2.76	4.86														11.39			10.12	8.46	3.07	5.41	3.2	2.07				5.85	1.3	2.25		3.12	Octadecanoic acid	90	18.103	73/57/60/43/129/55/71/87/69/41
	Comp. 110				1.67								1.94				2.02	2.12	1.87			2.14																Stearic acid	83	18.11	59/73/72/55/43/57/60/41/69/83
	Comp. 111							2.32	2.58			2.34																								1.26		1-Propene-1,2,3-tricarboxylic acid, tributyl ester	90	18.117	112/157/57/156/41/139/59/72/55/213
	Comp. 112																0.59		1.55			0.58			1.49	0.66			1.05			0.78				2.21		9-Octadecenoic acid, ethyl ester	91	18.187	55/69/88/84/67/83/43/96/97/41
	Comp. 113					1																																Unidentified	69	18.241	69/86/169/83/55/68/125/41/70/57
	Comp. 114																																	1.03				Unidentified	53	18.269	252/185/184/91/119/134/133/105/248/171
	Comp. 115	1.69																																				Unidentified	76	18.3375	91/42/121/105/55/79/119/93/133/135
	Comp. 116		0.69		1.3	0.36	0.97	2.01	2.09	1.07	1.98	2.44	4.07	1.79	0.82	3.84	2.39	2.62	2.48	0.96		2.58	2.33	2.83	2.86	0.46							0.88	1.09			0.52	Hexadecanamide	94	18.374	59/72/43/41/55/57/60/86/43/128
	Comp. 117																				4.4						2.65	1.06	0.67			1.81						9-Octadecenyl acetate	91	18.409	82/96/81/55/67/43/95/68/69/83
	Comp. 118											1.59																					0.47				0.36	Butyl citrate	84	18.52	185/129/259/57/41/186/111/106/105/56
	Comp. 119																				1.21	0.98			2.61	1.82			3.66			3.12						Ethyl Stearate	92	18.531	88/101/157/89/43/55/70/73/57/213
	Comp. 120									1.53	3.05			2.9	1.65	2.1							1.56															Hexadecanamide	93	18.536	59/72/43/55/57/41/60/86/128/73
	Comp. 121																																0.54	1.78	1.5			C34-C36 alkane	95	18.572	57/71/85/43/99/113/127/41/55/69
	Comp. 122					0.46							0.39							1.98	1.05		0.32									0.92						Octacosyl acetate	95	18.729	97/83/57/43/61/69/82/70/111/55
	Comp. 123								1.2	3.24		2.46																										Unidentified	70	19.327	106/162/105/91/161/43/147/107/163/81
	Comp. 124																									0.79			3.61			1.62						Unidentified	72	19.553	177/69/126/105/41/121/93/149/79/55
	Comp. 125				2.76		0.17	3.69	9.23	0.42		5.35	0.5			1.04		1.75		0.67	0.66	0.99	0.28										2.99			7.34	36.96	Tributyl acetylcitrate	92	19.608	185/129/259/43/57/157/41/186/139/213
	Comp. 126									1.21		2.7					0.5																					Unidentified	69	19.687	124/106/105/91/43/81/162/161/147/82
	Comp. 127																			0.35									0.57				1.57	1.53	2.27			C34-C36 alkane	94	19.861	57/71/85/43/99/113/127/41/55/69
	Comp. 128																												1.26			2.59						1-Dodecanol, 2-octyl-	87	20.624	57/83/71/43/97/69/55/85/70/111
	Comp. 129		6.45		17.76	0.64	3.87	29.89	21.9	24.44	35.19	34.25	40.93	41.1	18.99	25.64	22.9	28.92	25.27	15.41	22.39	27.27	20.19	22.4	14.43	6		3.36	1.75			6.17	3.61	3.36	6.98		3.74	Oleoamide	95	20.856	59/72/55/41/43/126/69/112/60/83
	Comp. 130				1.32			1.13	1.44	0.48	0.87	1.52	1.32	0.87	0.54		1	1.4	1.27		0.62	0.85	0.32	1.17	0.54		2.73						0.27					Octadecanamide	89	21.03	59/125/153/72/70/91/244/43/41/55
	Comp. 131						0.49													2.56														1.12				Cyclo(D-Phe-L-Pro)	90	21.035	125/153/70/91/244/59/120/260/41/154
	Comp. 132				0.54			0.64							0.73		1.55	0.76	0.67	1.28	0.76				0.52			1.41					3.83	1.68	2.79			C20-C36 alkane	91	21.152	57/71/85/43/99/55/113/41/141/97
	Comp. 133									1.06	1.25		1.06										0.24															C34 alkane	92	21.282	57/125/71/85/70/153/244/91/43/113
	Comp. 134															1.4																						Unidentified	74	21.322	55/162/79/105/91/67/81/80/119/68
	Comp. 135		1.68																																			Unidentified	76	21.814	226/227/184/100/91/44/190/42/55/224
	Comp. 136																					0.81		1.22														Methyl hexadecadienoate	80	21.824	67/81/59/79/95/55/72/41/80/43
	Comp. 137											1.87																										Unidentified	56	21.83	188/296/67/81/281/55/95/187/189/108
	Comp. 138																														2.87							C34- Alkane	94	21.9579	57/71/85/43/99/113/41/55/127/97
	Comp. 139									0.75		2.51																										Unidentified	74	22.009	136/121/298/137/105/91/203/283/95/79
	Comp. 140																									1.87												Unidentified	78	22.06	57/145/71/43/55/85/98/84/69/97
	Comp. 141							6.17																														10-12-Pentacosadiynoic acid	83	22.061	91/105/79/55/162/80/41/67/93/119
	Comp. 142				0.83				1.82								0.45	0.89			0.68												1.42			1.47	1.06	Tetraethylene glycol di(2-ethylhexanoate)	86	22.069	171/57/127/99/170/114/113/98/55/43
	Comp. 143							3.52																														Unidentified	76	22.205	79/99/80/55/110/71/82/164/67/81
	Comp. 144															1.99																						Unidentified	78	22.268	55/162/79/105/91/67/81/80/119/68
	Comp. 145				0.37		0.16	1.74		0.9	1.05	0.52	1.04		0.73		1.53	0.35	1.02	0.84	0.67	0.54						1.98	0.57				5.96	2.59	3.33			C22-C36 alkane	81	22.471	57/71/117/85/43/99/113/55/69/130
	Comp. 146																1.8												1.57					8.12	13.52			2,4-Bis(1-phenylethyl)phenol	80	22.57	315/237/330/316/91/119/103/331/150/238
	Comp. 147																					0.93			0.96				3.52			2.4						9-Octadecenyl acetate	95	22.718	82/96/81/55/67/95/83/69/97/110
	Comp. 148																1.25												1.17					4.74	12.38			2,4-Bis(dimethylbenzyl)-6-t-butylphenol	90	22.792	371/293/386/372/119/91/387/57/294/103
	Comp. 149																												0.5			1.78						Nonadecyl pentafluoropropionate	89	23.006	57/83/97/71/69/55/85/43/111/41
	Comp. 150											1.75																										Unidentified	76	23.233	105/161/91/106/126/79/162/148/108/119
	Comp. 151										0.5		2.49						1.34																			Unidentified	59	23.287	72/67/81/59/135/95/55/121/80/41
	Comp. 152				0.57		0.15		0.33	0.43	0.52	0.64	2.18				2.3	0.36	1.13	1.1	1.18						2.18	1.97	0.67	0.5		0.6	7.62	1.43	2.93	1.03	0.45	C20-C36 alkane	91	23.481	57/71/85/43/99/113/127/55/83/41
	Comp. 153											1.01	2.63						0.96																			Unidentified	63	23.823	55/69/207/83/41/95/72/128/43/97
	Comp. 154		1.14		1.47	0.22	0.4	0.92				0.5	1.68			0.53	1.67		1.5	1.29	1.05	1.03		1.03	1.04		2.74	1.99	0.59	1.12			8.06	1.48	2.4	1.03	1.09	C20-C36 alkane	90	24.584	57/71/85/43/99/83/113/127/55/82
	Comp. 155				0.88					4.7	4.35												8.63													1.79	0.4	Unidentified	69	24.723	117/130/131/57/43/71/98/55/341/129
	Comp. 156																																			3.4		Unidentified	75	25.116	71/155/57/127/85/43/126/41/55/81
	Comp. 157																																			1.09		Unidentified	47	25.19	155/57/43/73/126/281/111/133/127/208
	Comp. 158																																			4.25		Unidentified	69	25.368	155/127/71/207/126/97/85/57/81/55
	Comp. 159		0.41		0.82			0.98	0.47	1.29		1.97	1.26	0.58		1.53	1.05	1.36	0.47	0.48	0.81	0.59	1.47	0.4		0.47								4			1.46	trans-13-Docosenamide	92	25.479	59/72/55/69/43/41/126/83/57/60
	Comp. 160		0.49		0.96		0.15	0.91		0.49	1.61		1.77		1.27	0.45	1.61		1.08	1.55	1.08	0.88					2.18	1.8	0.49				6.76	1.55	1.78	1.71	0.39	C34-C36 alkane	93	25.647	57/71/85/43/99/113/127/97/55/141
	Comp. 161													6.91							2.26	11.85	18.38	16.87	20.06	10.91	17.16	20.91	6.51									3,6-Dibenzylpiperazine-2,5-dione	92	25.807	91/203/294/175/92/120/103/65/77/130
	Comp. 162				0.35																															1.99		Unidentified	75	25.903	155/57/127/71/281/185/126/85/109/69
	Comp. 163		0.84			0.38	0.5	1.15			0.98	2.04	1.32	1	0.93		0.93	1.22	1.53	1.43	1.52	1.54		1.54	2.24			6.32		2.5						32.05	0.43	Squalene	94	26.171	69/81/95/41/136/121/93/109/68/107
	Comp. 164																																				2.09	Unidentified	46	26.209	293/107/245/233/218/42/246/217/158/294
	Comp. 165		0.61		6.89		0.28	1.27	0.36	0.45	0.46	0.9	1.62		1.09	0.59	2.57	0.85	0.96	1.58	0.72	0.78	0.34					1.89	0.56	1.76		0.63	6.76	0.88	1.51	2.04	0.89	C20-C36 alkane	81	26.743	57/71/85/43/207/99/113/127/55/141
	Comp. 166																																			3.45		Unidentified	75	26.975	135/366/119/143/81/95/247/69/55/149
	Comp. 167					1.02	0.59																															Unidentified	69	27.903	251/376/197/155/105/252/236/207/141/69
	Comp. 168				0.59								0.86		0.71				0.68	1.97		0.57											4.35	0.48		2.51		C24-C36 alkane	92	27.967	57/71/85/99/43/113/127/97/83/141
	Comp. 169																																	0.69	1.48			2,4,6-Tris(1-methyl-1-phenylethyl)phenol	84	28.469	433/448/355/91/119/434/277/449/103/356
	Comp. 170				1.81			0.94	2.08			0.51	3.44		1.54		2.33	3.68	1.43	2.06	0.78	1.01											4.64	1.67			1.02	C34-C36 alkane	87	29.409	57/71/85/99/43/113/127/55/97/141
	Comp. 171																																	1.09	1.61			Unidentified	62	29.513	117/230/231/115/215/118/216/232/116/217
	Comp. 172					0.33	0.94			2.01	2.52			1.72		1.89												3.95		1.76								Unidentified	66	29.613	135/394/143/57/81/43/71/149/85/119
	Comp. 173				0.5					0.73			0.86		0.74				0.33	1.1	0.74	0.94												0.69				Unidentified	72	29.735	396/147/81/145/105/381/95/107/57/288
	Comp. 174																	4.74																			6.85	Unidentified	70	29.938	107/233/245/186/361/293/69/41/158/42
	Comp. 175						0.19																							2.7								Unidentified	67	29.963	396/147/81/145/288/105/381/55/95/283
	Comp. 176															1.78																						Unidentified	70	30.02	147/396/145/81/105/95/69/288/275/381
	Comp. 177																														1.25							Unidentified	60	30.0524	209/165/69/163/126/177/55/41/166/195
	Comp. 178																					5.95																Unidentified	75	30.434	86/72/55/69/71/43/85/57/87/70
	Comp. 179																	0.37		0.5													2.29					C33-C36 alkane	89	31.031	57/71/85/99/43/113/97/127/83/69
	Comp. 180																				0.72																	Octacosyl acetate-isomer	84	31.285	72/101/57/71/83/97/43/69/111/85
	Comp. 181													1.1																								Unidentified	72	31.375	97/83/57/69/111/82/43/61/85/55
	Comp. 182					1.65	1.14																															7,22-Ergostadienol acetate	85	31.975	271/69/81/107/91/255/147/119/105/55
	Comp. 183																														4.05							Unidentified	62	32.5374	209/165/69/126/55/41/166/163/101/177
	Comp. 184																																1.6					C36 alkane	89	33.003	57/71/85/99/43/113/127/97/83/141
	Comp. 185																																	5.65				β-Sitosterol	84	33.771	81/145/414/329/396/95/43/105/213/107
	Comp. 186									3.78																												Unidentified	77	34.241	57/414/71/329/43/95/107/105/396/55
	Comp. 187						1.44				4.01					5.16			4.5											8.32								g-Sitosterol	84	34.321	95/205/414/81/121/43/105/83/109/213
	Comp. 188						0.32													1.43																		Unidentified	69	34.566	257/57/43/83/71/55/69/97/111/256
	Comp. 189														0.83				0.48															1.05				α-Amyrin	87	35.07	281/203/119/95/189/135/122/107/109/133
	Comp. 190				1.06		0.36																															Unidentified	75	35.378	268/267/69/253/269/57/109/214/39/55
	Comp. 191									1.26										0.7																		Unidentified	71	36.511	174/410/71/57/55/85/43/159/161/175
	Comp. 192																												28.79									Stearyl palmitate	83	37.597	257/57/256/97/83/71/111/69/85/43
